# Supplementary material
Source: publisher site journal article supplement (https://www.dovepress.com/get_supplementary_file.php?f=297671.docx)
Supplement: Supplementary file 1 [file get_supplementary_file.php]

# Appendix

Appendix 1: ICD-10-CM diagnosis codes for wound complications

| Code | Description | Category |
| --- | --- | --- |
| T81.4XXA | Infection following a procedure, initial encounter | SSI |
| T81.4XXD | Infection following a procedure, subsequent encounter | SSI |
| T81.4XXS | Infection following a procedure, sequela | SSI |
| T81.40XA | Infection following a procedure, unspecified, initial encounter | SSI |
| T81.40XD | Infection following a procedure, unspecified, subsequent encounter | SSI |
| T81.40XS | Infection following a procedure, unspecified, sequela | SSI |
| T81.41XA | Infection following a procedure, superficial incisional surgical site, initial encounter | SSI |
| T81.41XD | Infection following a procedure, superficial incisional surgical site, subsequent encounter | SSI |
| T81.41XS | Infection following a procedure, superficial incisional surgical site, sequela | SSI |
| T81.42XA | Infection following a procedure, deep incisional surgical site, initial encounter | SSI |
| T81.42XD | Infection following a procedure, deep incisional surgical site, subsequent encounter | SSI |
| T81.42XS | Infection following a procedure, deep incisional surgical site, sequela | SSI |
| T81.43XA | Infection following a procedure, organ and space surgical site, initial encounter | SSI |
| T81.43XD | Infection following a procedure, organ and space surgical site, subsequent encounter | SSI |
| T81.43XS | Infection following a procedure, organ and space surgical site, sequela | SSI |
| T81.49XA | Infection following a procedure, other surgical site, initial encounter | SSI |
| T81.49XD | Infection following a procedure, other surgical site, subsequent encounter | SSI |
| T81.49XS | Infection following a procedure, other surgical site, sequela | SSI |
| T81.30XA | Disruption of wound, unspecified, initial encounter | Wound dehiscence |
| T81.30XD | Disruption of wound, unspecified, subsequent encounter | Wound dehiscence |
| T81.30XS | Disruption of wound, unspecified, sequela | Wound dehiscence |
| T81.31XA | Disruption of external operation (surgical) wound, not elsewhere classified, initial encounter | Wound dehiscence |
| T81.31XD | Disruption of external operation (surgical) wound, not elsewhere classified, subsequent encounter | Wound dehiscence |
| T81.31XS | Disruption of external operation (surgical) wound, not elsewhere classified, sequela | Wound dehiscence |
| T81.32XA | Disruption of internal operation (surgical) wound, not elsewhere classified, initial encounter | Wound dehiscence |
| T81.32XD | Disruption of internal operation (surgical) wound, not elsewhere classified, subsequent encounter | Wound dehiscence |
| T81.32XS | Disruption of internal operation (surgical) wound, not elsewhere classified, sequela | Wound dehiscence |
| L02.212 | Cutaneous abscess of back [any part, except buttock] | Cellulitis/abscess |
| L02.219 | Cutaneous abscess of trunk, unspecified | Cellulitis/abscess |
| L02.818 | Cutaneous abscess of other sites | Cellulitis/abscess |
| L02.91 | Cutaneous abscess, unspecified | Cellulitis/abscess |
| L03.312 | Cellulitis of back [any part except buttock] | Cellulitis/abscess |
| L03.319 | Cellulitis of trunk, unspecified | Cellulitis/abscess |
| L03.818 | Cellulitis of other sites | Cellulitis/abscess |
| L03.90 | Cellulitis, unspecified | Cellulitis/abscess |
| T81.89XA | Other complications of procedures, not elsewhere classified, initial encounter (granuloma) | Other wound complication |
| T81.89XD | Other complications of procedures, not elsewhere classified, subsequent encounter (granuloma) | Other wound complication |
| T81.89XS | Other complications of procedures, not elsewhere classified, sequela (granuloma) | Other wound complication |

Abbreviations: SSI, Surgical site infection.

**APPENDIX**

Appendix 2: All wound complication, surgical site infections, and wound dehiscence during index and follow-up time periods after open sigmoidectomy using SSPP

| Wound complications | Overall | | Admission type | | | |
| --- | --- | --- | --- | --- | --- | --- |
| Elective | | Non-elective | |
| N | % | N | % | N | % |
| Wound complications at index | | | | | | |
| ALL | 333 | 100.0 | 222 | 66.7 | 111 | 33.3 |
| All wound complications | 10 | 3.0 | 6 | 2.7 | 4 | 3.6 |
| SSI | 9 | 2.7 | 5 | 2.3 | 4 | 3.6 |
| Wound dehiscence | 1 | 0.3 | 1 | 0.5 | - | 0.0 |
| Abscess/cellulitis/granuloma | 1 | 0.3 | 1 | 0.5 | - | 0.0 |
|  |  |  |  |  |  |  |
| Wound complications during index and 30-day follow-up | | | | | | |
| ALLa | 327 | 100.0 | 219 | 67.0 | 108 | 33.0 |
| All wound complications | 20 | 6.1 | 11 | 5.0 | 9 | 8.3 |
| SSI | 17 | 5.2 | 9 | 4.1 | 8 | 7.4 |
| Wound dehiscence | 3 | 0.9 | 2 | 0.9 | 1 | 0.9 |
| Abscess/cellulitis/granuloma | 2 | 0.6 | 1 | 0.5 | 1 | 0.9 |
| a Based on patients with an index admission to a hospital that continued to contribute data for at least 30 days after discharge  Abbreviations: SSI, Surgical site infection; SSPP, STRATAFIXTM Symmetric PDSTM Plus Knotless Tissue Control Device | | | | | | |

# APPENDIX

Appendix 3: Economic and healthcare resource utilization outcomes of open sigmoidectomy using SSPP

| Variables | Overall  (N = 333) | Admission type | |
| --- | --- | --- | --- |
| Elective  (N = 222) | Non-elective  (N = 111) |
| Operating room time (mins) |  |  |  |
| Mean (SD) | 191.2 (66.8) | 188.2 (64.9) | 199.3 (70.3) |
| Median | 180.0 | 180.0 | 195.0 |
| Length of stay (days) |  |  |  |
| Mean (SD) | 7.6 (13.9) | 4.0 (3.8) | 14.8 (21.9) |
| Median | 4.0 | 3.0 | 11.0 |
| Operating room cost |  |  |  |
| Mean (SD) | $10,045 ($3,204) | $10,094 ($2,606) | $9,946 ($4,163) |
| Median | $10,040 | $10,047 | $9,847 |
| Supply cost |  |  |  |
| Mean (SD) | $3,602 ($1,704) | $3,225 ($1,503) | $3,406 ($2,019) |
| Median | $3,261 | $3,225 | $3,406 |
| Room and board cost |  |  |  |
| Mean (SD) | $9,9484 ($22,007) | $4,654 ($5,090) | $19,145 ($35,616) |
| Median | $4,644 | $3,311 | $11,639 |
| Total hospital cost |  |  |  |
| Mean (SD) | $30,868 ($47,071) | $21,560 ($10,273) | $49,483 ($77,141) |
| Median | $21,615 | $19,130 | $34,559 |
| All cause readmission, N (%) |  |  |  |
| 30-day readmissiona | 68 (11.8) | 33 (8.8) | 35 (17.2) |
| 60-day readmissionb | 95 (16.9) | 49 (13.4) | 46 (23.3) |
| 90-day readmissionc | 116 (21.1) | 58 (16.2) | 58 (30.1) |
| a Based on 327 patients: 219 in elective group and 108 in non-elective group  b Based on 316 patients: 211 in elective group and 105 in non-elective group  c Based on 307 patients: 204 in elective group and 103 in non-elective group  Abbreviations: SD, Standard deviation; SSPP, STRATAFIXTM Symmetric PDSTM Plus Knotless Tissue Control Device | | | |

**APPENDIX**

Appendix 4: Primary diagnoses and procedures for 30-day readmissions after open colorectal procedures using SSPP

| ICD code | Description | Overall readmissions | | Elective readmissions | | Nonelective readmissions | |
| --- | --- | --- | --- | --- | --- | --- | --- |
| N | % | N | % | N | % |
|  | ALL | 84 |  | 41 |  | 43 |  |
| PRIMARY DIAGNOSES | | | | | | | |
| Gastrointestinal and infection-related primary diagnoses | |  |  |  |  |  |  |
| K56.60 | Unspecified intestinal obstruction | 1 | 1.2 | 1 | 2.4 | 0 | 0 |
| K56.609 | Unspecified intestinal obstruction, unspecified as to partial versus complete obstruction | 2 | 2.4 | 2 | 4.9 | 0 | 0.0 |
| K56.69 | Other intestinal obstruction | 1 | 1.2 | 1 | 2.4 | 0 | 0.0 |
| K57.32 | Diverticulitis of large intestine without perforation or abscess without bleeding | 2 | 2.4 | 1 | 2.4 | 1 | 2.3 |
| K61.1 | Rectal abscess | 1 | 1.2 | 1 | 2.4 | 0 | 0.0 |
| K62.5 | Hemorrhage of anus and rectum | 1 | 1.2 | 0 | 0.0 | 1 | 2.3 |
| K63.0 | Abscess of intestine | 1 | 1.2 | 1 | 2.4 | 0 | 0.0 |
| K63.2 | Fistula of intestine | 1 | 1.2 | 1 | 2.4 | 0 | 0.0 |
| K65.1 | Peritoneal abscess | 2 | 2.4 | 1 | 2.4 | 1 | 2.3 |
| K68.11 | Postprocedural retroperitoneal abscess | 1 | 1.2 | 0 | 0.0 | 1 | 2.3 |
| K85.30 | Drug induced acute pancreatitis without necrosis or infection | 1 | 1.2 | 1 | 2.4 | 0 | 0.0 |
| K91.0 | Vomiting following gastrointestinal surgery | 1 | 1.2 | 1 | 2.4 | 0 | 0.0 |
| K91.3 | Postprocedural intestinal obstruction | 1 | 1.2 | 1 | 2.4 | 0 | 0.0 |
| K91.81 | Other intraoperative complications of digestive system | 1 | 1.2 | 1 | 2.4 | 0 | 0.0 |
| K91.870 | Postprocedural hematoma of a digestive system organ or structure following a digestive system procedure | 1 | 1.2 | 1 | 2.4 | 0 | 0.0 |
| K91.872 | Postprocedural seroma of a digestive system organ or structure following a digestive system procedure | 1 | 1.2 | 1 | 2.4 | 0 | 0.0 |
| K91.89 | Other postprocedural complications and disorders of digestive system | 2 | 2.4 | 1 | 2.4 | 1 | 2.3 |
| K92.2 | Gastrointestinal hemorrhage, unspecified | 1 | 1.2 | 0 | 0.0 | 1 | 2.3 |
| K94.13 | Enterostomy malfunction | 1 | 1.2 | 1 | 2.4 | 0 | 0.0 |
| K94.19 | Other complications of enterostomy | 1 | 1.2 | 1 | 2.4 | 0 | 0.0 |
| T81.31XA | Disruption of external operation (surgical) wound, not elsewhere classified, initial encounter | 1 | 1.2 | 0 | 0.0 | 1 | 2.3 |
| T81.43XA | Infection following a procedure, organ and space surgical site, initial encounter | 1 | 1.2 | 0 | 0.0 | 1 | 2.3 |
| T81.49XA | Infection following a procedure, other surgical site, initial encounter | 2 | 2.4 | 0 | 0.0 | 2 | 4.7 |
| T81.4XXA | Infection following a procedure, initial encounter | 13 | 15.5 | 8 | 19.5 | 5 | 11.6 |
| T81.89XA | Other complications of procedures, not elsewhere classified, initial encounter | 1 | 1.2 | 0 | 0.0 | 1 | 2.3 |
| Other primary diagnoses | |  |  |  |  |  |  |
| A04.7 | Enterocolitis due to Clostridium difficile | 1 | 1.2 | 1 | 2.4 | 0 | 0.0 |
| A04.72 | Enterocolitis due to Clostridium difficile, not specified as recurrent | 6 | 7.1 | 3 | 7.3 | 3 | 7.0 |
| A41.51 | Sepsis due to Escherichia coli [E. coli] | 1 | 1.2 | 1 | 2.4 | 0 | 0.0 |
| A41.9 | Sepsis, unspecified organism | 7 | 8.3 | 2 | 4.9 | 5 | 11.6 |
| C16.9 | Malignant neoplasm of stomach, unspecified | 1 | 1.2 | 0 | 0.0 | 1 | 2.3 |
| C18.7 | Malignant neoplasm of sigmoid colon | 1 | 1.2 | 0 | 0.0 | 1 | 2.3 |
| C78.7 | Secondary malignant neoplasm of liver and intrahepatic bile duct | 1 | 1.2 | 1 | 2.4 | 0 | 0.0 |
| C79.11 | Secondary malignant neoplasm of bladder | 1 | 1.2 | 0 | 0.0 | 1 | 2.3 |
| C83.39 | Diffuse large B-cell lymphoma, extranodal and solid organ sites | 1 | 1.2 | 0 | 0.0 | 1 | 2.3 |
| D64.9 | Anemia, unspecified | 1 | 1.2 | 0 | 0.0 | 1 | 2.3 |
| G89.18 | Other acute postprocedural pain | 1 | 1.2 | 0 | 0.0 | 1 | 2.3 |
| I21.4 | Non-ST elevation (NSTEMI) myocardial infarction | 1 | 1.2 | 1 | 2.4 | 0 | 0.0 |
| I46.9 | Cardiac arrest, cause unspecified | 1 | 1.2 | 0 | 0.0 | 1 | 2.3 |
| I48.0 | Paroxysmal atrial fibrillation | 1 | 1.2 | 0 | 0.0 | 1 | 2.3 |
| I81 | Portal vein thrombosis | 1 | 1.2 | 0 | 0.0 | 1 | 2.3 |
| I82.421 | Acute embolism and thrombosis of right iliac vein | 1 | 1.2 | 0 | 0.0 | 1 | 2.3 |
| J90 | Pleural effusion, not elsewhere classified | 1 | 1.2 | 0 | 0.0 | 1 | 2.3 |
| J96.22 | Acute and chronic respiratory failure with hypercapnia | 1 | 1.2 | 0 | 0.0 | 1 | 2.3 |
| N17.9 | Acute kidney failure, unspecified | 6 | 7.1 | 4 | 9.8 | 2 | 4.7 |
| N32.1 | Vesicointestinal fistula | 1 | 1.2 | 0 | 0.0 | 1 | 2.3 |
| R10.9 | Unspecified abdominal pain | 2 | 2.4 | 1 | 2.4 | 1 | 2.3 |
| R53.81 | Other malaise | 2 | 2.4 | 0 | 0.0 | 2 | 4.7 |
| T80.219A | Unspecified infection due to central venous catheter, initial encounter | 1 | 1.2 | 0 | 0.0 | 1 | 2.3 |
| Z43.2 | Encounter for attention to ileostomy | 1 | 1.2 | 1 | 2.4 | 0 | 0.0 |
| PRIMARY PROCEDURES | | | | | | | |
| 0D1B0Z4 | Bypass Ileum to Cutaneous, Open Approach | 1 | 1.2 | 1 | 2.4 | 0 | 0.0 |
| 0DB80ZZ | Excision of Small Intestine, Open Approach | 1 | 1.2 | 1 | 2.4 | 0 | 0.0 |
| 0DQ98ZZ | Repair Duodenum, Via Natural or Artificial Opening Endoscopic | 1 | 1.2 | 1 | 2.4 | 0 | 0.0 |
| 0TBB8ZZ | Excision of Bladder, Via Natural or Artificial Opening Endoscopic | 1 | 1.2 | 0 | 0.0 | 1 | 2.3 |
| 02H633Z | Insertion of Infusion Device into Right Atrium, Percutaneous Approach | 1 | 1.2 | 1 | 2.4 | 0 | 0.0 |
| 02HV33Z | Insertion of Infusion Device into Superior Vena Cava, Percutaneous Approach | 3 | 3.6 | 1 | 2.4 | 2 | 4.7 |
| 0FT10ZZ | Resection of Right Lobe Liver, Open Approach | 1 | 1.2 | 1 | 2.4 | 0 | 0.0 |
| 0W993ZX | Drainage of Right Pleural Cavity, Percutaneous Approach, Diagnostic | 1 | 1.2 | 0 | 0.0 | 1 | 2.3 |
| 0W9B3ZZ | Drainage of Left Pleural Cavity, Percutaneous Approach | 1 | 1.2 | 0 | 0.0 | 1 | 2.3 |
| 0W9G30Z | Drainage of Peritoneal Cavity with Drainage Device, Percutaneous Approach | 5 | 6.0 | 3 | 7.3 | 2 | 4.7 |
| 0W9J30Z | Drainage of Pelvic Cavity with Drainage Device, Percutaneous Approach | 2 | 2.4 | 1 | 2.4 | 1 | 2.3 |
| 0W9J3ZZ | Drainage of Pelvic Cavity, Percutaneous Approach | 1 | 1.2 | 1 | 2.4 | 0 | 0.0 |
| 0W9L30Z | Drainage of Lower Back with Drainage Device, Percutaneous Approach | 1 | 1.2 | 1 | 2.4 | 0 | 0.0 |
| 0WJG3ZZ | Inspection of Peritoneal Cavity, Percutaneous Approach | 1 | 1.2 | 1 | 2.4 | 0 | 0.0 |
| 0WJP0ZZ | Inspection of Gastrointestinal Tract, Open Approach | 1 | 1.2 | 1 | 2.4 | 0 | 0.0 |
| 30233N1 | Transfusion of Nonautologous Red Blood Cells into Peripheral Vein, Percutaneous Approach | 4 | 4.8 | 0 | 0.0 | 4 | 9.3 |
| 3E10X8Z | Irrigation of Skin and Mucous Membranes using Irrigating Substance | 1 | 1.2 | 1 | 2.4 | 0 | 0.0 |
| 5A09557 | Assistance with Respiratory Ventilation, Greater than 96 Consecutive Hours, Continuous Positive Airway Pressure | 1 | 1.2 | 0 | 0.0 | 1 | 2.3 |
| 5A1C60Z | Performance of Biliary Filtration, Multiple | 1 | 1.2 | 0 | 0.0 | 1 | 2.3 |
| 5A1D60Z | Performance of Urinary Filtration, Multiple | 1 | 1.2 | 1 | 2.4 | 0 | 0.0 |
| D0004ZZ | Beam Radiation of Brain using Heavy Particles (Protons, Ions) | 1 | 1.2 | 0 | 0.0 | 1 | 2.3 |
| F07M3ZZ | Motor Function Treatment of Musculoskeletal System - Whole Body | 1 | 1.2 | 0 | 0.0 | 1 | 2.3 |
| F07M6ZZ | Therapeutic Exercise Treatment of Musculoskeletal System - Whole Body | 1 | 1.2 | 0 | 0.0 | 1 | 2.3 |

Abbreviations: SSPP, STRATAFIXTM Symmetric PDSTM Plus Knotless Tissue Control Device

# APPENDIX

Appendix 5: Multivariable-adjusted comparison of wound complications in elective vs. non-elective open colorectal procedures using SSPPa

| Outcome | AORb | 95% CI | p-valueb | Adjusted Outcomesc | | | |
| --- | --- | --- | --- | --- | --- | --- | --- |
| Electivec | Non-electivec | Difference | 95% CIc |
| All wound complicationsa |  |  |  |  |  |  |  |
| During index | 1.9 | (0.54, 6.48) | 0.324 | 3.9% | 2.4% | 1.5% | (-0.01%, 0.05%) |
| During index and 30-day follow-up | 1.1 | (0.62, 1.87) | 0.793 | 7.1% | 6.7% | 0.3% | (-0.02%, 0.03%) |
| Surgical site infections |  |  |  |  |  |  |  |
| During index | 2.2 | (0.52, 9.31) | 0.281 | 3.9% | 2.1% | 1.8% | (-0.01%, 0.05%) |
| During index and 30-day follow-up | 1.3 | (0.45, 3.86) | 0.606 | 6.4% | 5.2% | 1.2% | (-0.03%, 0.06%) |

Abbreviations: AOR, Adjusted odds ratio; CI, Confidence interval; SSPP, STRATAFIXTM Symmetric PDSTM Plus Knotless Tissue Control Device

aComplications is a composite endpoint consisting of surgical site infections, wound dehiscence, and other wound complications (abscess/cellulitis/granuloma)

bAdjusted for demographic, procedural, and hospital/provider characteristics

cMultivariable-adjusted outcomes based on marginal standardization method
